# Supplementary material
Source: PubMed Central journal article supplement (PMC8508957)
Supplement: NIHMS1699906-supplement-Supplementary_Material.pdf [file NIHMS1699906-supplement-Supplementary_Material.pdf]

**Supplemental Information**

**Alpha-Ketoglutarate, an Endogenous  
Metabolite, Extends Lifespan and  
Compresses Morbidity in Aging Mice**

**Azar Asadi Shahmirzadi, Daniel Edgar, Chen-Yu Liao, Yueh-Mei Hsu, Mark Lucanic, Arash Asadi Shahmirzadi, Christopher D. Wiley, Garbo Gan, Dong Eun Kim, Herbert G. Kasler, Chisaka Kuehnemann, Brian Kaplowitz, Dipa Bhaumik, Rebecca R. Riley, Brian K. Kennedy, and Gordon J. Lithgow**

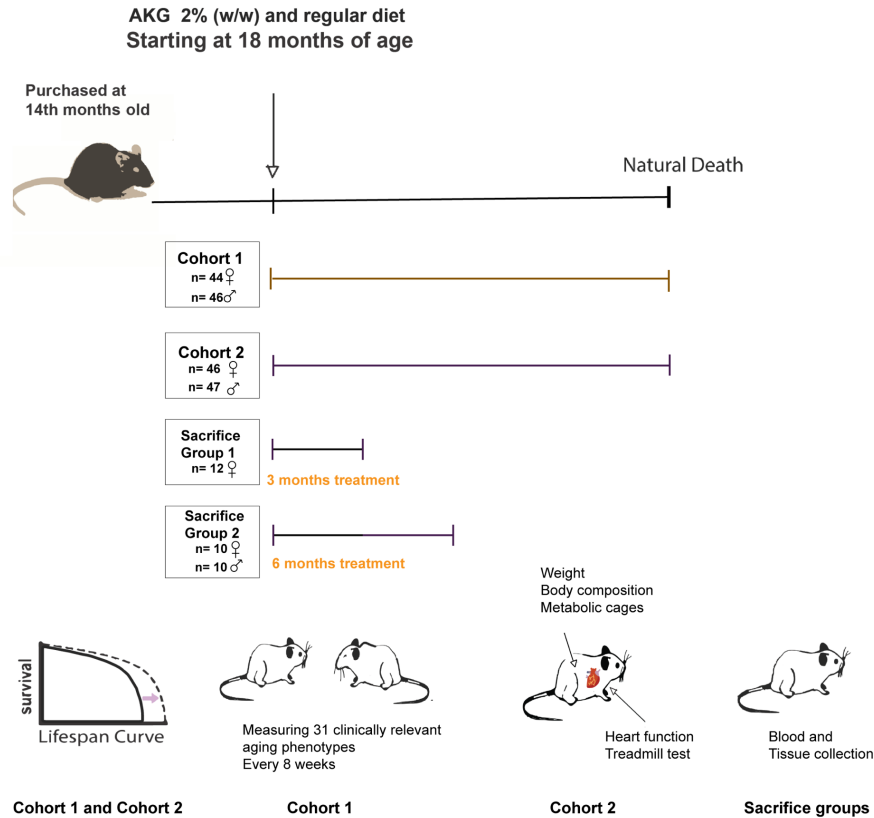

**List of assessed deficits in aged mice- Frailty index**

| Integument:          | Physical/Musculoskeletal:  | Vestibulocochlear/Auditory: | Digestive/Urogenital:                |
|----------------------|----------------------------|-----------------------------|--------------------------------------|
| 1. Alopecia          | 6. Tumors                  | 14. Vestibular disturbance  | 23. Malocclusions                    |
| 2. Loss of fur color | 7. Distended abdomen       | 15. Hearing loss            | 24. Rectal prolapse                  |
| 3. Dermatitis        | 8. Kyphosis                | 16. Cataracts               | 25. Vaginal/uterine/ Penile prolapse |
| 4. Loss of whiskers  | 9. Tail stiffening         | 17. Eye discharge/swelling  | 26. Diarrhea                         |
| 5. Coat condition    | 10. Gait disorders         | 18. Microphthalmia          | <b>Respiratory system:</b>           |
|                      | 11. Tremor                 | 19. Corneal opacity         | 27. Breathing rate/depth             |
|                      | 12. Forelimb grip strength | 20. Vision loss             | <b>Discomfort and others:</b>        |
|                      | 13. Body condition score   | 21. Menace reflex           | 28. Mouse Grimace                    |
|                      |                            | 22. Nasal discharge         | 29. Piloerection                     |
|                      |                            |                             | 30. Temperature                      |
|                      |                            |                             | 31. Weight                           |

**Figure S1. Experimental Design, Related to Figure 1-4.** The mice were fed AKG or Standard diet at 18 months of age. The study consists of two cohorts (n=183 animal total) and two sacrifice groups. Cohort-1 consists of female control (n=24), female AKG (n=20), male control (n=24) and male AKG (n=22) animals. Cohort-2 consists of female control (n=23), female AKG (n=23), male control (n=24) and male AKG (n=23) animals. All cohorts and sacrificed groups were started on diet at the same age (18 months). Cohort-1 mice were used for all the frailty index measurements and lifespan. Cohort-2 mice were used for replication of survival, metabolic studies and complementary aging studies. List of assessed 31 clinically relevant frailty is provided. All the phenotypes were scored as described by Whitehead, J.C., et al., except for temperature and weight for which the new scaling scores were used. **Temperature and Weights Scoring:** Briefly, average and standard deviations (STDEV) were calculated sex specifically using our own baseline data sets (data collected before the start of the treatment-mice at 18th month old). A decrease in temperature or weight within one STDEV is scored as a (0), a decrease bigger than one STDEV but smaller than 2 STDEV will be scored as a (0.5) and any decrease more than 2 STDEV is scored as a (1)

|               |                                                                      | Age (days) at 50% mortality |          | Age (days) at 90% mortality |          | Age (days) at 100% mortality |          |
|---------------|----------------------------------------------------------------------|-----------------------------|----------|-----------------------------|----------|------------------------------|----------|
|               |                                                                      | Cohort-1                    | Cohort-2 | Cohort-1                    | Cohort-2 | Cohort-1                     | Cohort-2 |
| <b>Female</b> | Control                                                              | 876                         | 847      | 1015                        | 931      | 1019                         | 948      |
|               | AKG                                                                  | 932                         | 875      | 1109                        | 962      | 1116                         | 975      |
|               | Percentage survival increase from inception of study (AKG vs. Cntrl) | 16.6%                       | 10.5%    | 19.7%                       | 8%       | 21%                          | 6.6%     |
|               | Percentage survival increase from birth (AKG vs. Cntrl)              | 6.3%                        | 3.3%     | 9%                          | 3.3%     | 10%                          | 2.8%     |
| <b>Male</b>   | Control                                                              | 955                         | 812      | 1068                        | 969      | 1109                         | 987      |
|               | AKG                                                                  | 995                         | 847      | 1155                        | 987      | 1173                         | 1008     |
|               | Percentage survival increase from inception of study (AKG vs. Cntrl) | 9.6%                        | 12.8%    | 16.4%                       | 4.2%     | 11.2%                        | 4.7%     |
|               | Percentage survival increase in survival from birth (AKG vs. Cntrl)  | 4.2%                        | 3.7%     | 8.1%                        | 1.8%     | 5.7%                         | 2.1%     |

**Table S1. The effect of AKG treatment on lifespan, Related to Figure 1.**

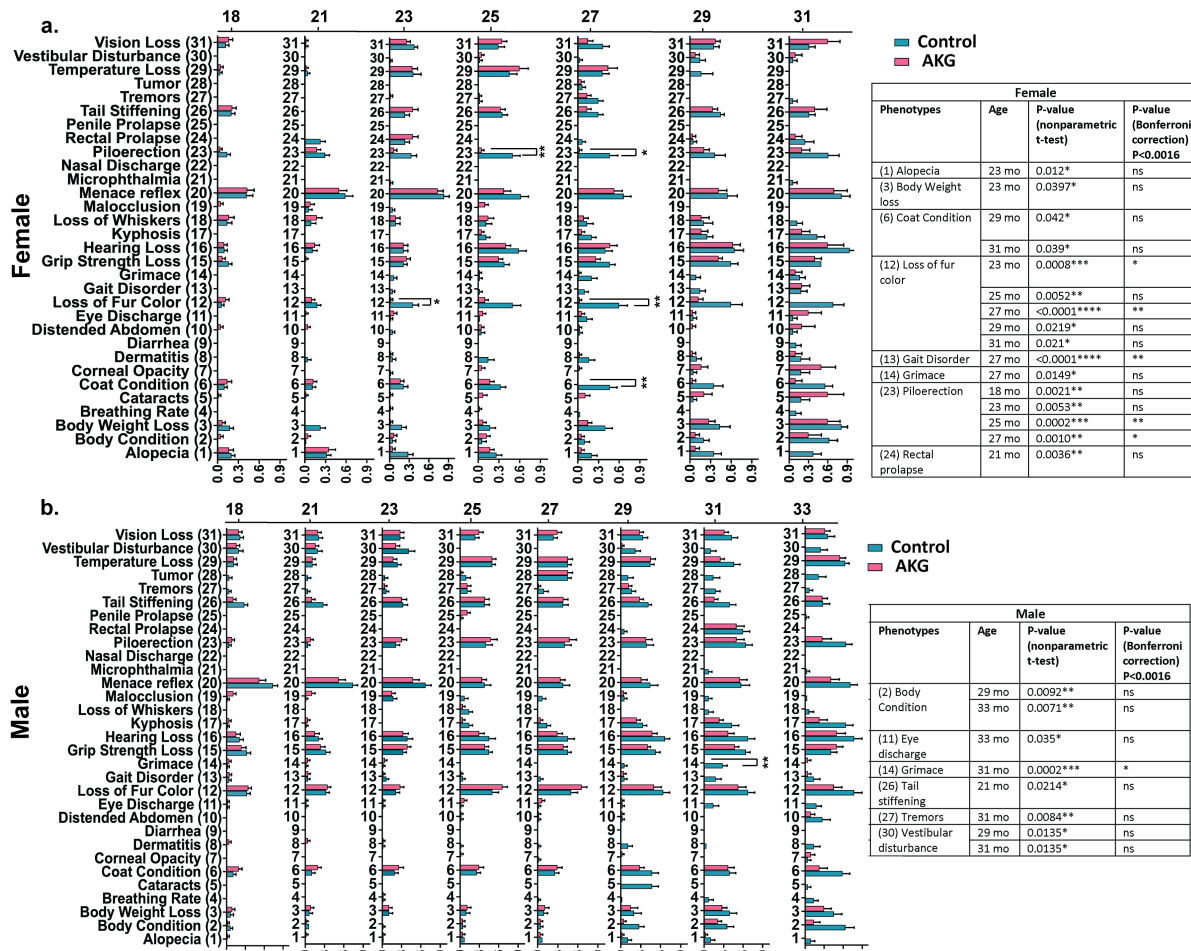

**Figure S2. AKG treatment extends health span and alleviates frailty phenotypes, Related to Figure 2.** All individual frailty phenotypes (total of 31 phenotypes), separately graphed (a) female and (b) male. Data are mean  $\pm$  s.e.m. of the group, n= all animals alive at each measurement time. \*P < 0.0016, \*\*P < 0.00032 (Non-parametric two tailed t-test, Bonferroni correction). As in almost all longitudinal studies, missing values have caused data fluctuations during the course of our study. The main contributor to this fluctuation is the death of the frail animal between measurement time points. When the deceased animal is omitted from the group, the total frailty score of the group is improved (lower scores). The remaining mice in the study might exhibit the phenotype, which again change the total score of the group.

| Frailty Phenotypes (Female) | Trend test (Mann-Kendall) |             | Frailty Phenotype (Female) | Trend test (Mann-Kendall) |             |
|-----------------------------|---------------------------|-------------|----------------------------|---------------------------|-------------|
|                             | S statistics              | P-Value     |                            | S statistics              | P-Value     |
| 1. Alopecia                 | 7                         | 0.3675207   | 17. Kyphosis               | 18                        | 0.0076802** |
| 2. Body Condition           | 21                        | 0.0026666*  | 18. Loss of Whiskers       | 6                         | 0.7595545   |
| 3. Body Weight              | 13                        | 0.0715054   | 19. Malocclusion           | -4                        | 0.45325471  |
| 4. Breathing Rate           | 9                         | 0.1282753   | 20. Menace Reflex          | 7                         | 0.3675207   |
| 5. Cataracts                | 11                        | 0.0572793   | 21. Microphthalmia         | 5                         | 0.4469742   |
| 6. Coat Condition           | 19                        | 0.0068637** | 22. Nasal Discharge        | 0                         | NaN         |
| 7. Corneal Opacity          | 11                        | 0.0572793   | 23. Piloerection           | 15                        | 0.0354981*  |
| 8. Dermatitis               | 17                        | 0.0162609*  | 24. Rectal Prolapse        | 13                        | 0.0567382   |
| 9. Diarrhea                 | 6                         | 0.2112995   | 25. Tail Stiffening        | 13                        | 0.0715054   |
| 10. Distended Abdomen       | 9                         | 0.1803918   | 26. Temperature Loss       | 5                         | 0.4523703   |
| 11. Eye Discharge           | 16                        | 0.0226870*  | 27. Tremors                | 9                         | 0.1803918   |
| 12. Loss of Fur color       | 20                        | 0.00389**   | 28. Tumors                 | 2                         | 0.8025873   |
| 13. Gait Disorder           | 18                        | 0.0098091** | 29. Vestibular Disturbance | 14                        | 0.0482861*  |
| 14. Grimace                 | 11                        | 0.1331284   | 30. Vision Loss            | 5                         | 0.5480055   |
| 15. Grip Strength Loss      | 17                        | 0.0162609*  | 31. Vaginal Prolapse       | 0                         | NaN         |
| 16. Hearing Loss            | 19                        | 0.0068637** |                            |                           |             |

| Frailty Phenotypes (Male) | Change with Age |             | Frailty Phenotype (Male)   | Change with Age |              |
|---------------------------|-----------------|-------------|----------------------------|-----------------|--------------|
|                           | S statistics    | P-Value     |                            | S statistics    | P-Value      |
| 1. Alopecia               | 22              | 0.009374**  | 17. Kyphosis               | 23              | 0.00609055** |
| 2. Body Condition         | 17              | 0.046063*   | 18. Loss of Whiskers       | 5               | 0.38273309   |
| 3. Body Weight            | 26              | 0.0019817** | 19. Malocclusion           | 4               | 0.706197     |
| 4. Breathing Rate         | 13              | 0.1077560   | 20. Menace Reflex          | 4               | 0.71052302   |
| 5. Cataracts              | 10              | 0.197012    | 21. Microphthalmia         | 11              | 0.10017829   |
| 6. Coat Condition         | 26              | 0.0019817** | 22. Nasal Discharge        | -7              | 0.3093073    |
| 7. Corneal Opacity        | 10              | 0.197012    | 23. Piloerection           | 22              | 0.00937477** |
| 8. Dermatitis             | 19              | 0.021895**  | 24. Rectal Prolapse        | 3               | 0.66252058   |
| 9. Diarrhea               | 0               | NaN         | 25. Tail Stiffening        | 12              | 0.17354622   |
| 10. Distended Abdomen     | 12              | 0.1439428   | 26. Temperature Loss       | 22              | 0.00937477** |
| 11. Eye Discharge         | 20              | 0.0169649*  | 27. Tremors                | 12              | 0.17354622   |
| 12. Loss of Fur color     | 22              | 0.0093747** | 28. Tumors                 | 23              | 0.00508587** |
| 13. Gait Disorder         | 14              | 0.0107762*  | 29. Vestibular Disturbance | 0               | 1            |
| 14. Grimace               | 4               | 0.6671689   | 30. Vision Loss            | 16              | 0.06348653   |
| 15. Grip Strength Loss    | 19              | 0.0248218*  | 31. Penile Prolapse        | 4               | 0.66716899   |
| 16. Hearing Loss          | 28              | 0.000836*** |                            |                 |              |

**Table S2. Results of statistical analysis that test for a possible monotonic trend for each frailty phenotype with aging (time), Related to Figure 3.** P values are the result of Mann-Kendall Trend Test for changes in frailty over time for females (Table 3) and males (Table 4), \*P <0.05, \*\*P <0.01 and \*\*\*P <0.001. The absolute value of S statistics indicate the direction and magnitude of the trend (S >0 an increasing trend, S <0 a decreasing trend, S=0 no trend).

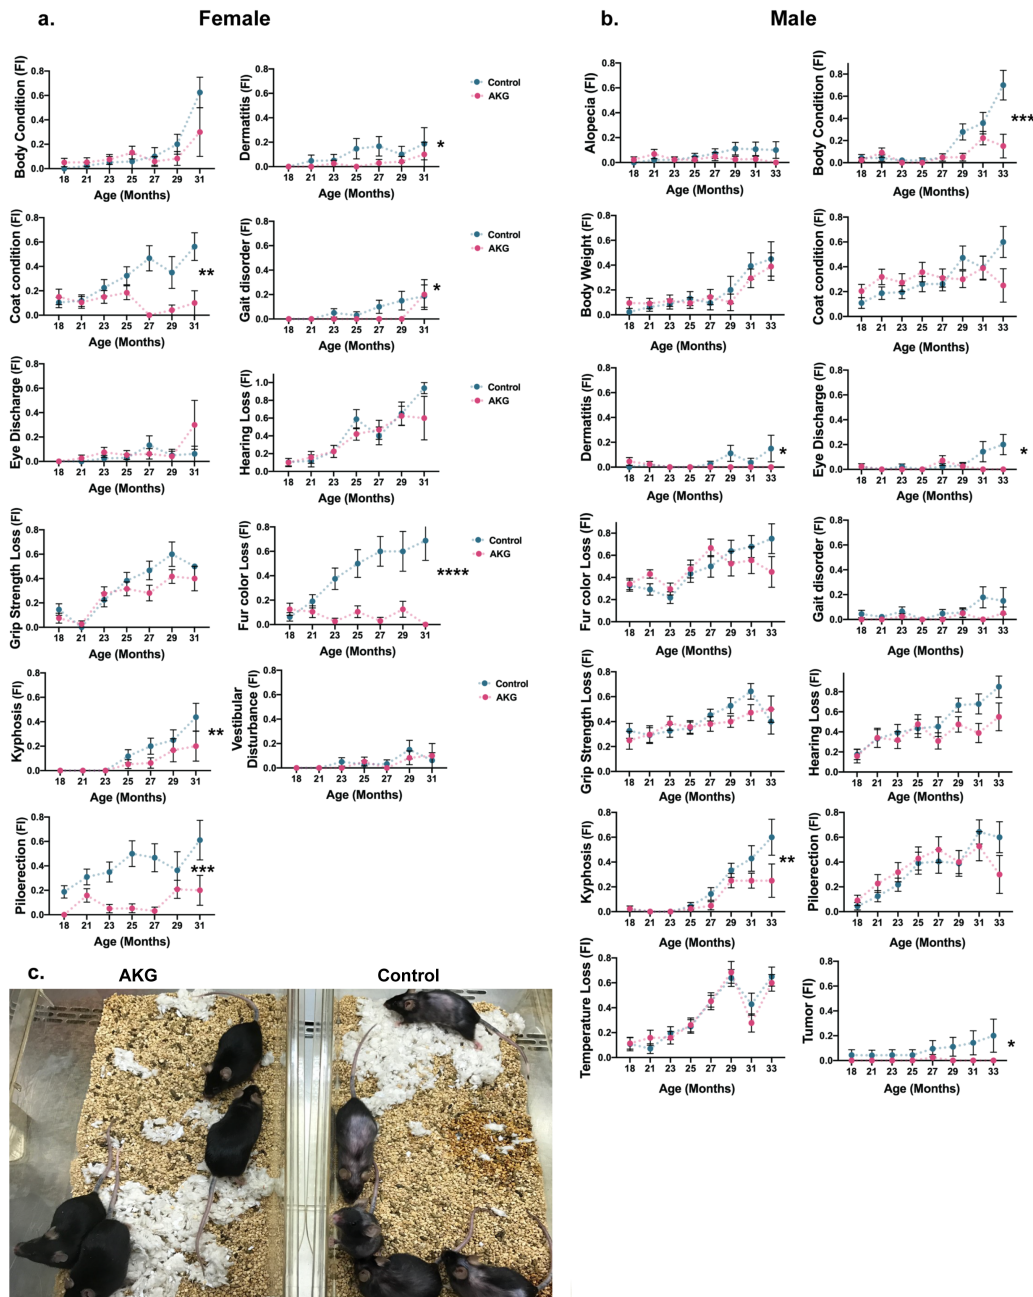

**Figure S3. Age-associated frailty phenotypes (including only those that have significant monotonic trend with time), Related to Figure 3.** Individually graphed frailty phenotypes that significantly increase with aging, comparing control with AKG treated mice for (a) female and (b) male. Data are mean  $\pm$  s.e.m. of the group. Mixed Models was used to test if each age dependent phenotype was affected by AKG supplementation for female (c) and male (d) in the study. \* $P < 0.05$ , \*\* $P < 0.01$ , \*\*\* $P < 0.001$ , \*\*\*\* $P < 0.0001$ . As in almost all longitudinal studies, missing values have caused data fluctuations during the course of our study. The main contributor to this fluctuation is the death of the frail animal between measurement time points. When the deceased animal is omitted from the group, the total frailty score of the group is improved (lower scores). The remaining mice in the study might exhibit the phenotype, which again change the total score of the group. (c) A picture of two cages of female mice side by side at the age of 28 months; on the left are AKG treated mice and on the right are control mice. As presented by the picture female AKG mice have better coat condition more black hair and less alopecia.

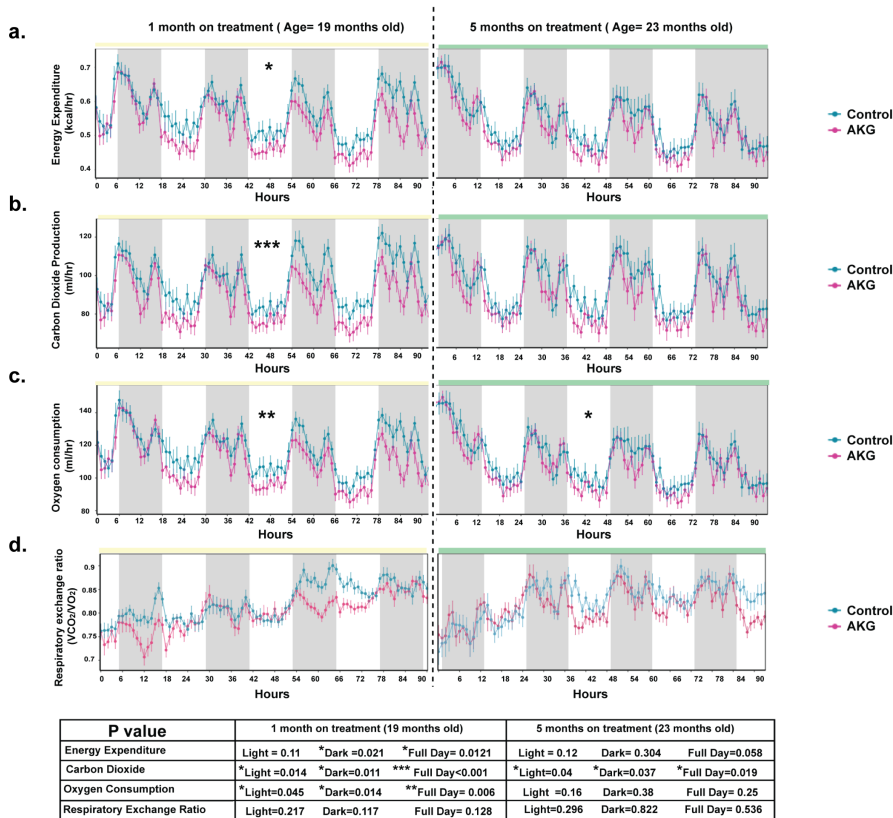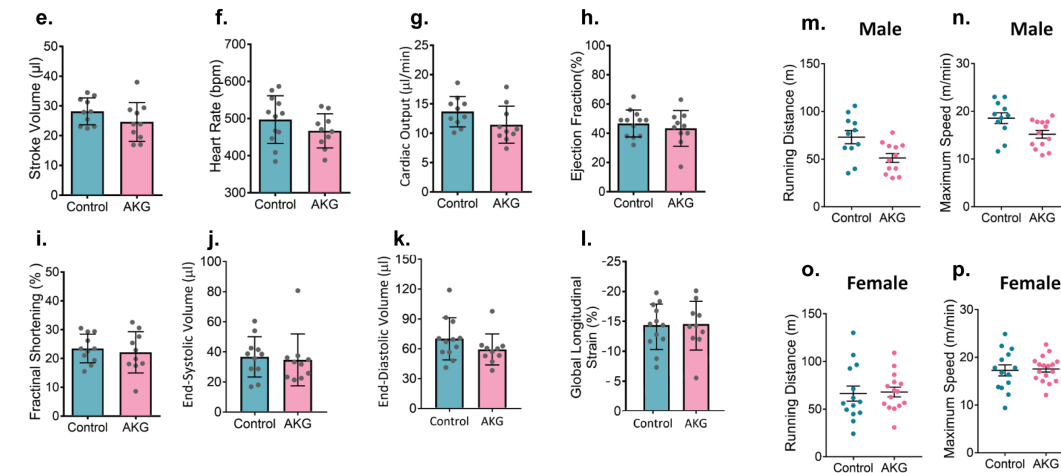

**Figure S4. Metabolic rate and heart function of aged mice (Cohort-2 data), Related to Figure 3.** (a) Energy expenditure, (b) Carbon dioxide production and (c) Oxygen consumption decrease upon AKG administration in female mice. However (d) Respiratory exchange ratio remains the same. Animals were monitored for about four consecutive days (92 hrs). The measurements were done at two separate time points during lifespan (19 and 23 months old) using same animals for both runs. Plots were generated using CalR, the data is adjusted to bodyweight. Control (n=5) and AKG (n=5). Data are mean±s.e.. \*p < 0.05 and \*\*\*p < 0.001 (Two way ANOVA tests). (e-l) Echocardiography test was performed to measure cardiovascular function close to animal median life, age=29 months old, n= all female animals alive at the time of study, data are mean±s.e.m. No significant change was observed for any of the measurements (t-test two tailed). Treadmill exhaustion tests were performed to measure cardiovascular system and motor function for (m,n) male and (o,p) female, age= 29 months old. n= all animals alive at the time of study. No significant change (t-test two tailed).

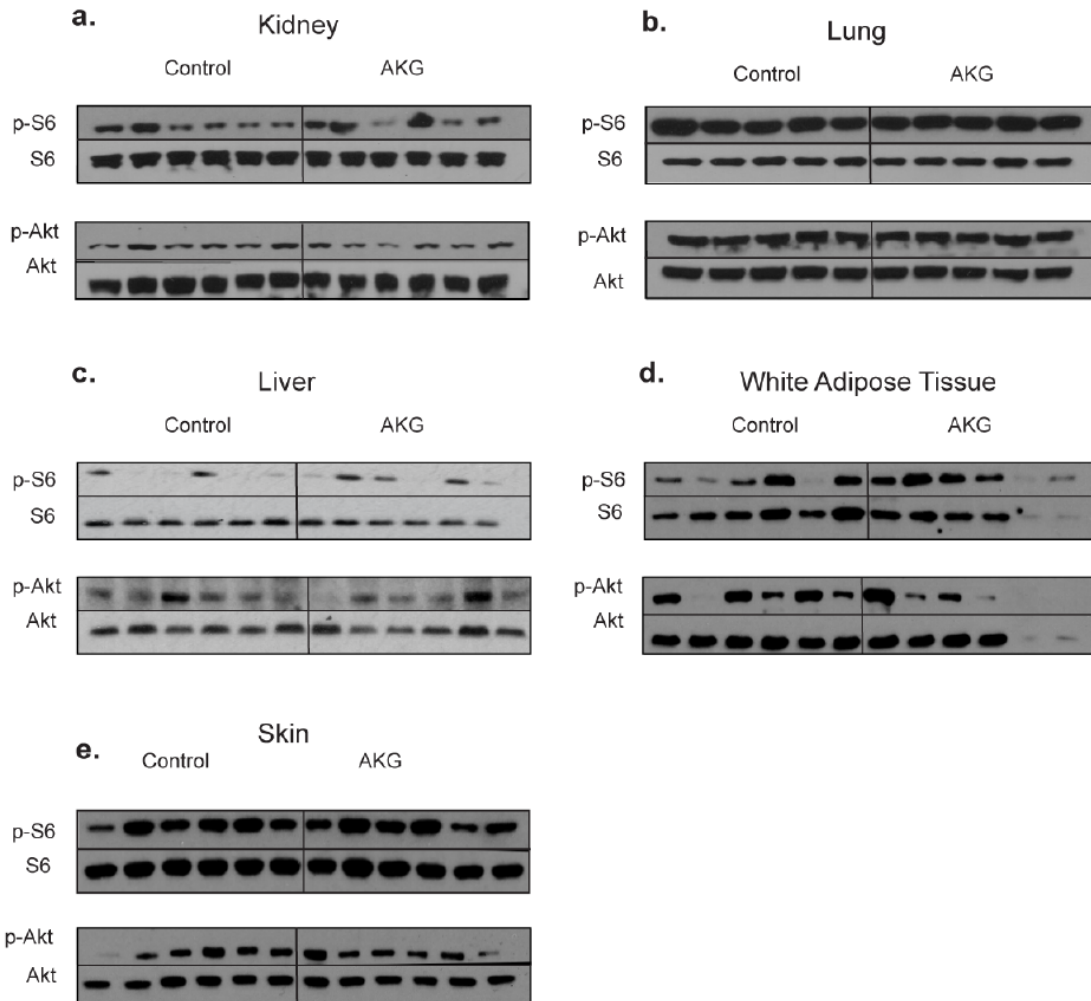

**Figure S5. mTOR activity is not changed in tissues of mice treated with AKG, Related to Figure 4.** (a-f) Western blots of mTORC1 (indicated by p-S6/S6) and mTORC2 (indicated by p-Akt/Akt) activities in multiple tissues of female mice treated with AKG for 3 months. Overall three months AKG treatment does not change mTORC1 and mTORC2 activities



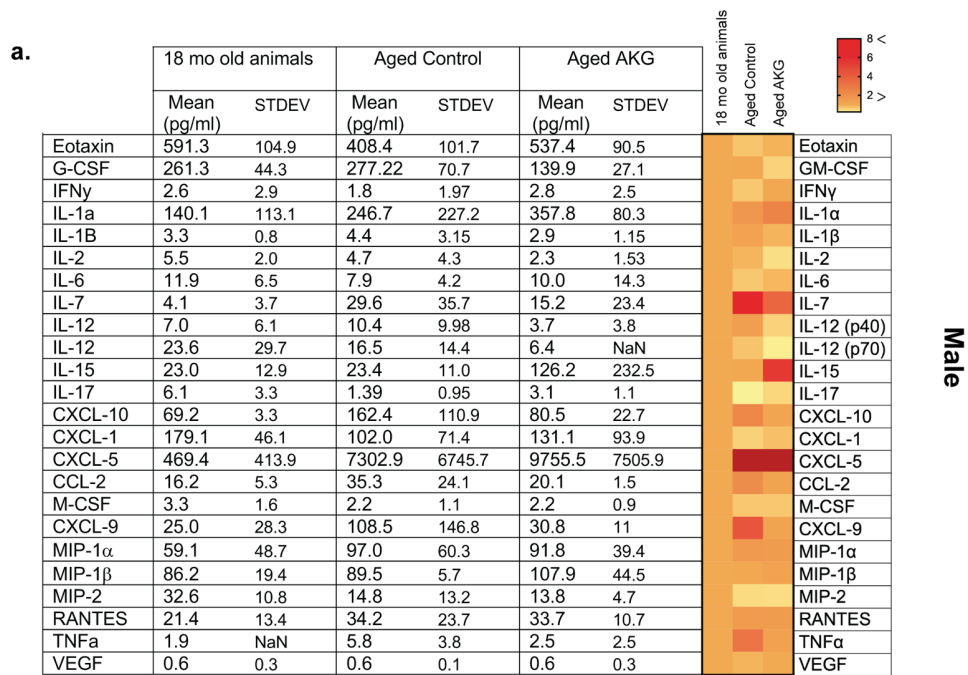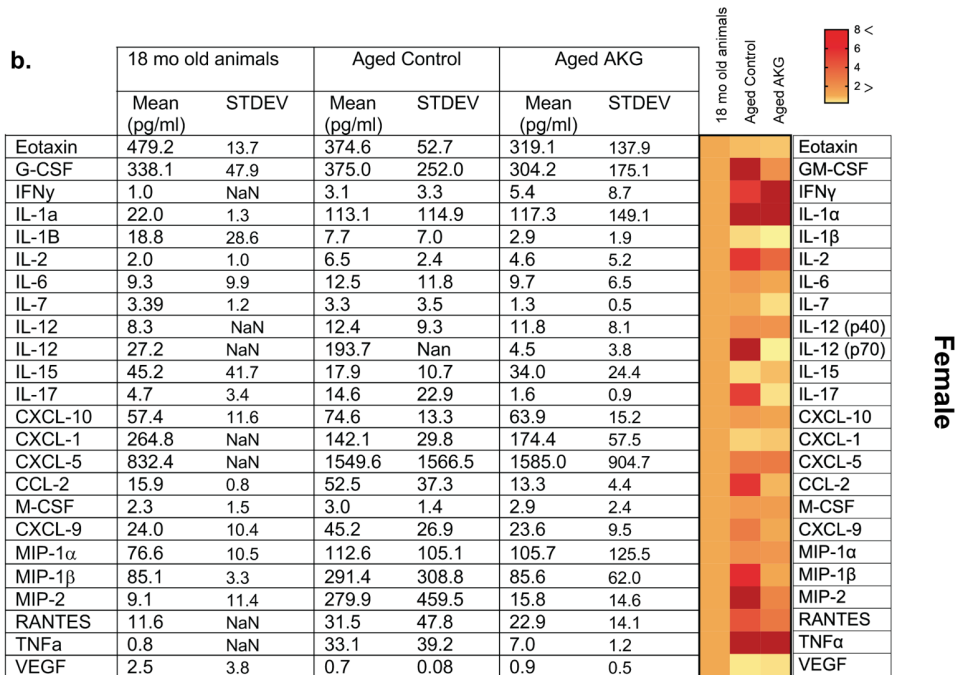

**Supplemental Figure 6. AKG reduces inflammation more robustly in females than in males, Related to Figure 4.** The mean plasma concentration of 24 inflammatory cytokines and chemokines of middle aged (age=18 months, n=5), aged control and AKG fed (24 months old, n=5) animals for (a) Male and (b) Female. The heatmap of each sex has been presented alongside their value chart. For graphing the heatmap, the fold changes of cytokines and chemokines were calculated for (a) males and (b) females using the untreated 18 months old animals as reference for each sex.

**Table S3. qRT-PCR primers used in this study, Related to Star Method (Oligonucleotides)**

| <b>Genes</b>               | <b>Forward primers (5'-3')</b> | <b>Reverse primers (5'-3')</b> | <b>Probe</b>                                                                             |
|----------------------------|--------------------------------|--------------------------------|------------------------------------------------------------------------------------------|
| Mouse p16 <sup>INK4A</sup> | AACTCTTTCGGTCGTACCCC           | TCCTCGCAGTTCGAATCTG            | Custom designed UPL probe:<br>5'-/56-FAM/AGG TGA TGA/ZEN/TGAT GGGCAACGTT CAC/3IABkFQ - 3 |
| Mouse p21                  | TTGCCAGCAGAATAAAAGGTG          | TTTGCTCCTGTGCGGAAC             | UPL Probe #9                                                                             |
| Human IL-1- $\alpha$       | GGTTGAGTTTAAGCCAATCCA          | TGCTGACCTAGGCTTGATGA           | UPL Probe #6                                                                             |
| Human IL-1- $\beta$        | CTGTCCTGCGTGTTGAAAGA           | TTGGGTAATTTTGGGATCTACA         | UPL Probe #78                                                                            |
| Human IL-6                 | GCCCAGCTATGAACTCCTTCT          | GAAGGCAGCAGGCAACAC             | UPL Probe #45                                                                            |
| Human IL-8                 | AGACAGCAGAGCACACAAGC           | ATGGTTCCTTCCGGTGGT             | UPL Probe #72                                                                            |
| Human CCL2                 | AGTCTCTGCCGCCCTTCT             | GTGACTGGGGCATTGATTG            | UPL Probe #40                                                                            |
| Human CXCL-1               | GCTGAACAGTGACAAATCCAAC         | CTTCAGGAACAGCCACCAGT           | UPL Probe #52                                                                            |
| Human MMP-3                | CAAAACATATTTCTTTGTAGAG GACAA   | TTCAGCTATTTGCTTGGGAAA          | UPL Probe #36                                                                            |
| Human actin                | CCAACCGCGAGAAGATGA             | TCCATCAGGATGCCAGTG             | UPL Probe #58                                                                            |
| Human p21                  | TCACTGTCTTGTACCCCTTGTGC        | GGCGTTTGGAGTGGTAGAAA           | UPL Probe #32                                                                            |
